# Supplementary material for: Enhanced visible light photocatalytic performance of Er, Mn co-doped monoclinic BiVO4 for efficient organic pollutant degradation
Source: Royal Society of Chemistry journal article supplement (doi:10.1039/d3re00620d), 2024-01-01
Supplement: d3re00620d1.pdf [file d3re00620d1.pdf]

## Supplementary Information

# Enhanced visible light photocatalytic performance of Er, Mn co-doped monoclinic BiVO<sub>4</sub> for efficient organic pollutant degradation

Shan Huang<sup>1,3</sup>, Jiajia Liu<sup>1</sup>, Lingxin Kong<sup>1</sup>, Mengmeng Wang<sup>1</sup>, Yi Liu<sup>1,2,4</sup>, Yi  
Fang<sup>1,\*</sup>, Qi Xiao<sup>1,\*</sup>

1. Guangxi Key Laboratory of Natural Polymer Chemistry and Physics, College of Chemistry and Materials, Nanning Normal University, Nanning 530001, P. R. China

2. School of Chemical and Environmental Engineering, Wuhan Polytechnic University, Wuhan 430023, P. R. China

3. Hubei Key Laboratory of Pollutant Analysis & Reuse Technology, Hubei Normal University, Huangshi 435002, P. R. China

4. Hubei Key Laboratory of Radiation Chemistry and Functional Materials, Hubei University of Science and Technology, Xianning 437100, P. R. China

\* Corresponding author. Tel.: +86 771 3908092;

E-mail address: [1272820703@qq.com](mailto:1272820703@qq.com)

\* Corresponding author. Tel.: +86 771 3908092;

E-mail address: [qi.xiao@whu.edu.cn](mailto:qi.xiao@whu.edu.cn) ORCID number: 0000-0002-6133-1853

**Table S1** Cell parameters, cell volume, Raman frequency, and bond length of photocatalysts.

| Sample                                               | Cell parameters |              |              | Cell<br>volume (Å <sup>3</sup> ) | Raman<br>frequency<br>(cm <sup>-1</sup> ) | Bond<br>length V-<br>O (Å) |
|------------------------------------------------------|-----------------|--------------|--------------|----------------------------------|-------------------------------------------|----------------------------|
|                                                      | <i>a</i> (Å)    | <i>b</i> (Å) | <i>c</i> (Å) |                                  |                                           |                            |
| BiVO <sub>4</sub>                                    | 5.199           | 11.72        | 5.107        | 310.75                           | 828.3                                     | 1.695                      |
| Er <sub>6%</sub> /BiVO <sub>4</sub>                  | 5.191           | 11.71        | 5.105        | 310.36                           | 810.8                                     | 1.706                      |
| Mn <sub>6%</sub> /BiVO <sub>4</sub>                  | 5.186           | 11.71        | 5.106        | 310.12                           | 826.6                                     | 1.696                      |
| Er <sub>6%</sub> Mn <sub>2%</sub> /BiVO <sub>4</sub> | 5.187           | 11.71        | 5.099        | 310.37                           | 812.3                                     | 1.705                      |

**Table S2** Specific surface area, pore volume, and average pore size of photocatalysts.

| Sample                                               | Specific surface area<br>(m <sup>2</sup> /g) | Pore volume<br>(cm <sup>3</sup> /g) | Average pore size<br>(nm) |
|------------------------------------------------------|----------------------------------------------|-------------------------------------|---------------------------|
| BiVO <sub>4</sub>                                    | 1.39                                         | 0.0046                              | 14.9                      |
| Er <sub>6%</sub> /BiVO <sub>4</sub>                  | 1.93                                         | 0.0071                              | 13.2                      |
| Mn <sub>6%</sub> /BiVO <sub>4</sub>                  | 1.68                                         | 0.0053                              | 14.6                      |
| Er <sub>6%</sub> Mn <sub>2%</sub> /BiVO <sub>4</sub> | 2.53                                         | 0.0094                              | 12.5                      |

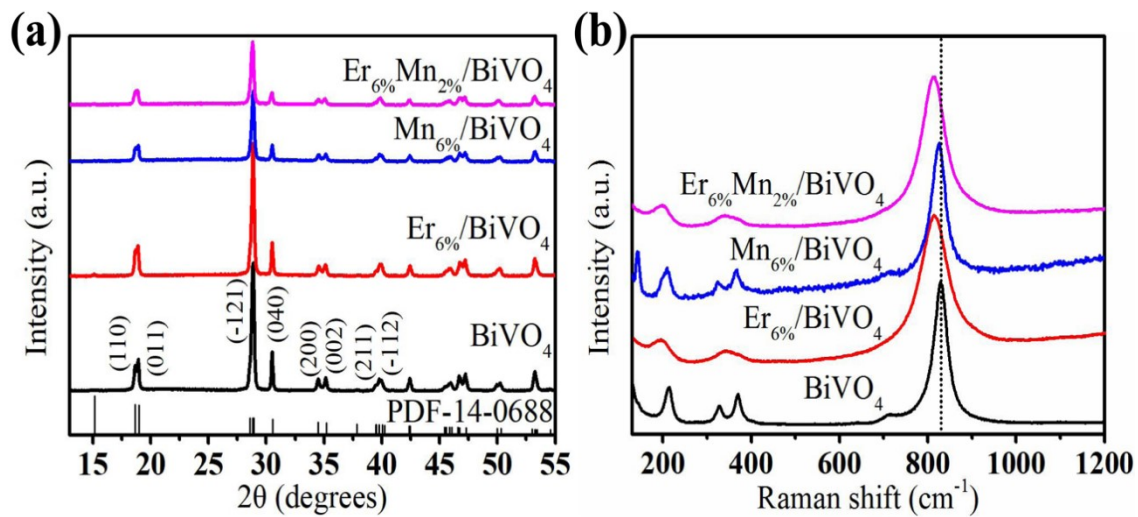

**Fig. S1.** XRD curves (a) and Raman spectra (b) of  $\text{BiVO}_4$ ,  $\text{Er}_{6\%}/\text{BiVO}_4$ ,  $\text{Mn}_{6\%}/\text{BiVO}_4$ , and  $\text{Er}_{6\%}\text{Mn}_{2\%}/\text{BiVO}_4$ .

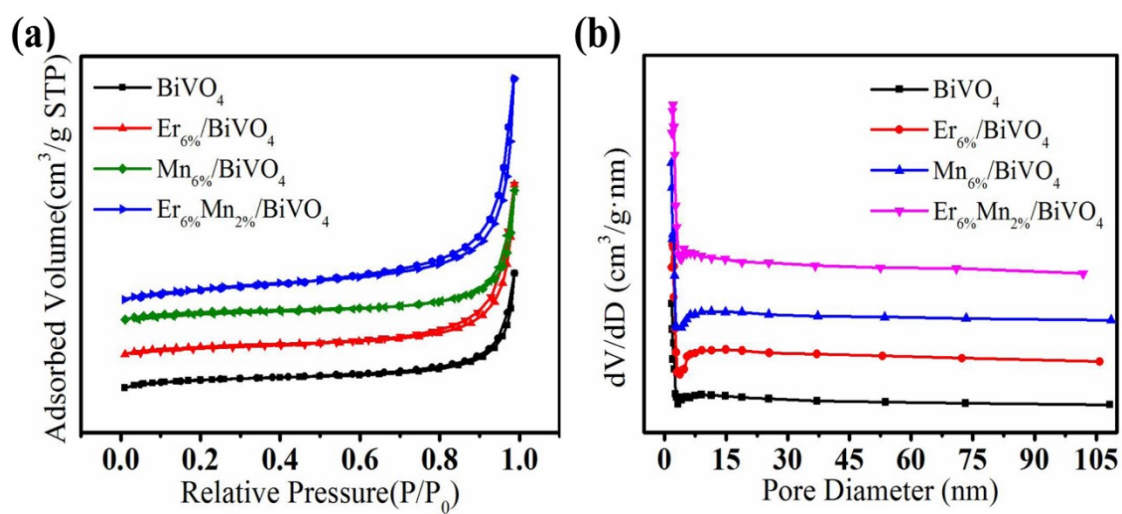

**Fig. S2.**  $\text{N}_2$  adsorption-desorption curves (a) and pore size distribution curves (b) of  $\text{BiVO}_4$ ,  $\text{Er}_{6\%}/\text{BiVO}_4$ ,  $\text{Mn}_{6\%}/\text{BiVO}_4$ , and  $\text{Er}_{6\%}\text{Mn}_{2\%}/\text{BiVO}_4$ .

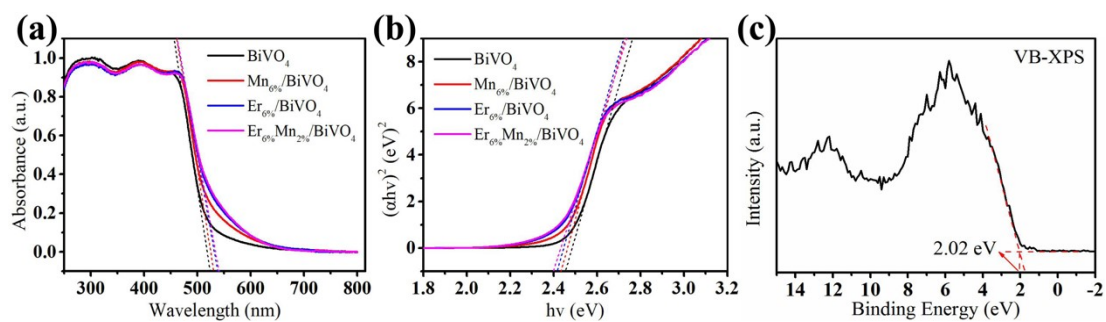

**Fig. S3.** UV-vis DRS (a) and the curves of  $(\alpha h\nu)^2$  versus  $(h\nu)$  (b) of BiVO<sub>4</sub>, Er<sub>6%</sub>/BiVO<sub>4</sub>, Mn<sub>6%</sub>/BiVO<sub>4</sub>, and Er<sub>6%</sub>Mn<sub>2%</sub>/BiVO<sub>4</sub>. (c) XPS-VB energy spectrum of Er<sub>6%</sub>Mn<sub>2%</sub>/BiVO<sub>4</sub>.

**Table S3** Comparison of properties of different doped BiVO<sub>4</sub>-based photocatalysts.

| Photocatalyst               | Pollutant | Concentration<br>(mg/L) | Light<br>Source | Time<br>(min) | Degradation<br>(%) | Refs      |
|-----------------------------|-----------|-------------------------|-----------------|---------------|--------------------|-----------|
| Br/BiVO <sub>4</sub>        | RhB       | 10                      | Visible         | 240           | 76.9               | 1         |
| C/BiVO <sub>4</sub>         | RhB       | 10                      | Visible         | 120           | 82                 | 2         |
| Bi/BiVO <sub>4</sub>        | RhB       | 10                      | Visible         | 360           | 85                 | 3         |
| Y/BiVO <sub>4</sub>         | RhB       | 10                      | Visible         | 180           | 91                 | 4         |
| Er/BiVO <sub>4</sub>        | RhB       | 10                      | Visible         | 180           | 88                 | 4         |
| Sm/BiVO <sub>4</sub>        | RhB       | 10                      | Visible         | 180           | 97.7               | 5         |
| Er-<br>Mn/BiVO <sub>4</sub> | RhB       | 10                      | Visible         | 100           | 97.8               | This work |

## References

- [1] C. Qin, H.R. Liao, F.Y. Rao, J.B. Zhong, J.Z. Li, One-pot hydrothermal preparation of Br-doped BiVO<sub>4</sub> with enhanced visible-light photocatalytic activity, *Solid State Sciences*. 105 (2020) 106285. DOI: 10.1016/j.solidstatesciences.2020.106285
- [2] R.J. Yang, R.S. Zhu, Y.Y. Fang, L.J. Hu, Q.Q. Chen, In situ synthesis of C-doped BiVO<sub>4</sub> with natural leaf as a template under different calcination temperatures, *RSC Adv.* 9(2019) 14004–14010. DOI: 10.1039/c9ra01875arsc.li/rsc-advances
- [3] C. Qin, X.L. Tang, J.F. Chen, H.R. Liao, J.B. Zhong, J.Z. Li, In-situ fabrication of Bi/BiVO<sub>4</sub> heterojunctions with N-doping for efficient elimination of contaminants. *Colloids and Surfaces A: Physicochemical and Engineering Aspects*. 617 (2021) 126224. DOI: 10.1016/j.colsurfa.2021.126224
- [4] S. Moscow, V. Kavinkumar, M. Sriramkumar, K. Jothivenkatachalam, P. Saravanan, N. Rajamohan, Y. Vasseghian, M. Rajasimman, Impact of Erbium (Er) and Yttrium (Y) doping on BiVO<sub>4</sub> crystal structure towards the enhancement of photoelectrochemical water splitting and photocatalytic performance. *Chemosphere*. 299 (2022) 134343. DOI: 10.1016/j.chemosphere.2022.134343
- [5] S.W. Zhu, Q.G. Li, M.K. Huttula, T.H. Li, W.Cao, One-pot hydrothermal synthesis of BiVO<sub>4</sub> microspheres with mixed crystal phase and Sm<sup>3+</sup>-doped BiVO<sub>4</sub> for enhanced photocatalytic activity. *J Mater Sci*. 52(2017) 1679–1693. DOI: 10.1007/s10853-016-0460-0
